# Supplementary material for: Soot oxidation in low-O2 and O2-free environments by lanthanum-based perovskites: structural changes and the effect of Ag doping
Source: Royal Society of Chemistry journal article supplement (doi:10.1039/d2cy00841f), 2022-01-01
Supplement: d2cy00841f1.pdf [file d2cy00841f1.pdf]

### Supporting information

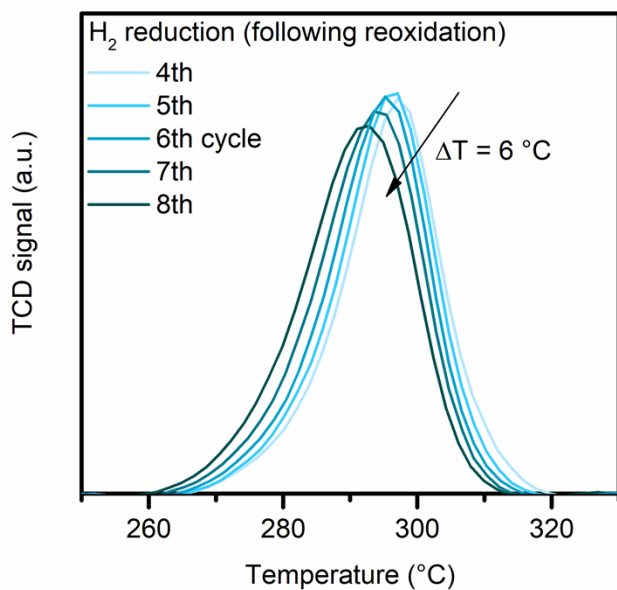

**Figure S1.** Cyclic H<sub>2</sub>-TPR of LCAO followed with reoxidation after each reduction step.

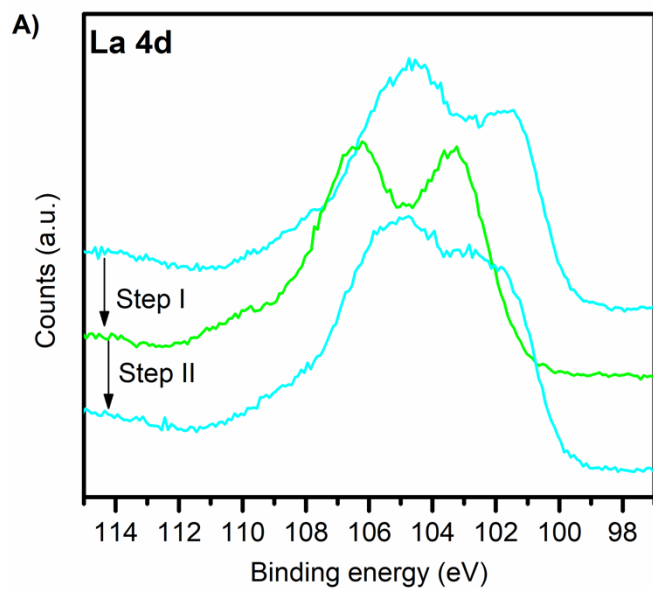

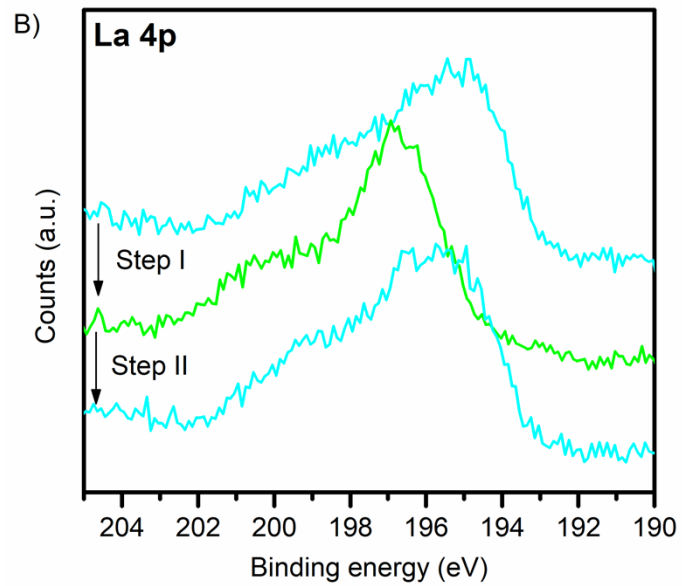

**Figure S2.** Supplementary XP spectra of LCO La 4d (A) and La 4p (B).

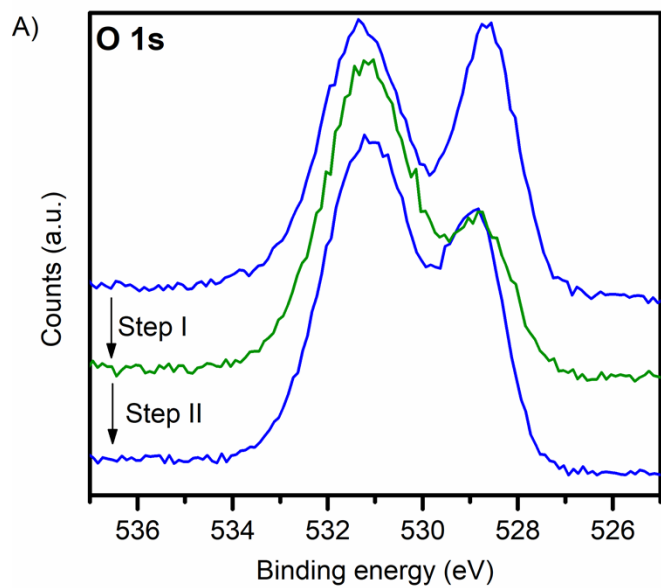

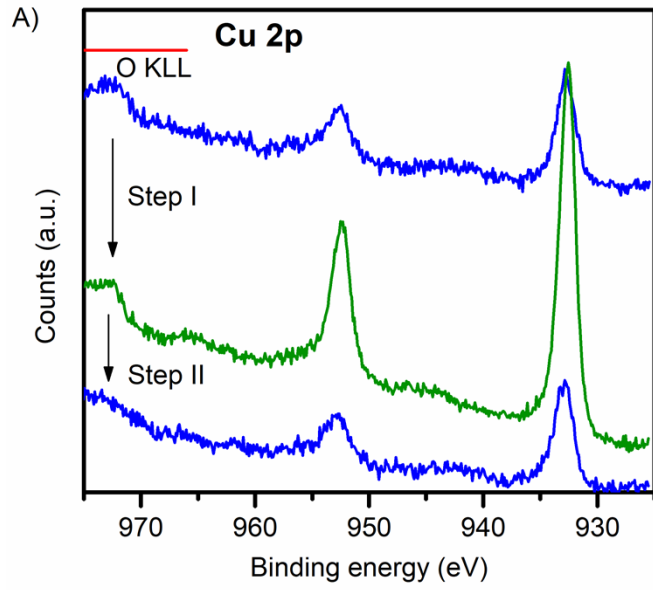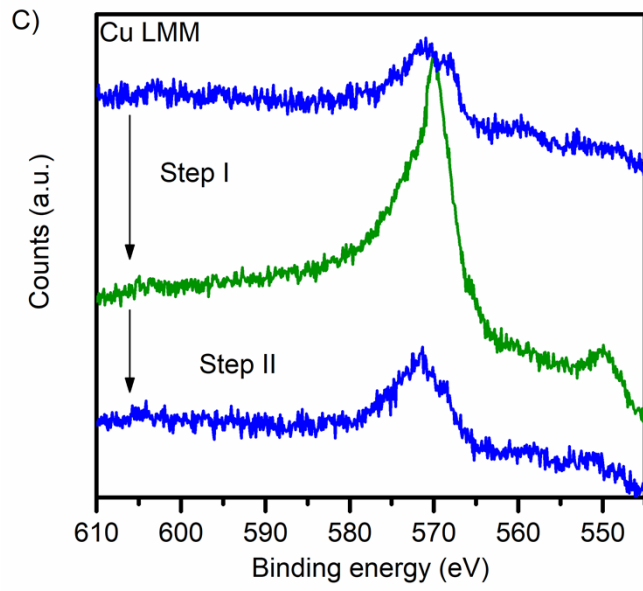

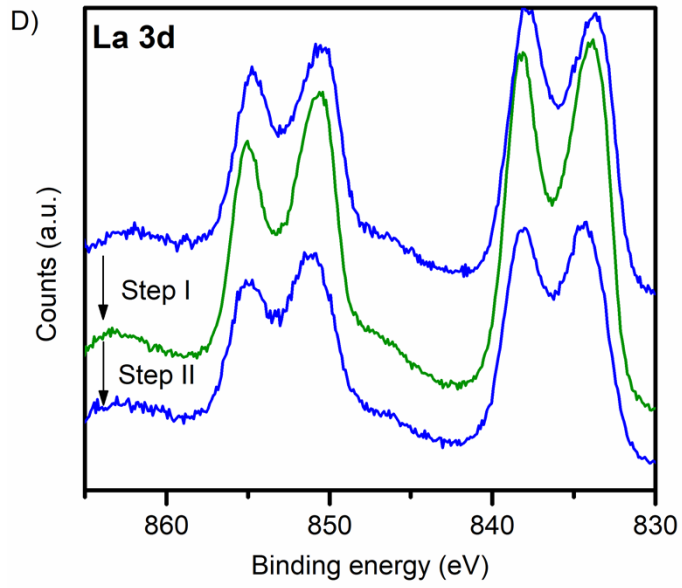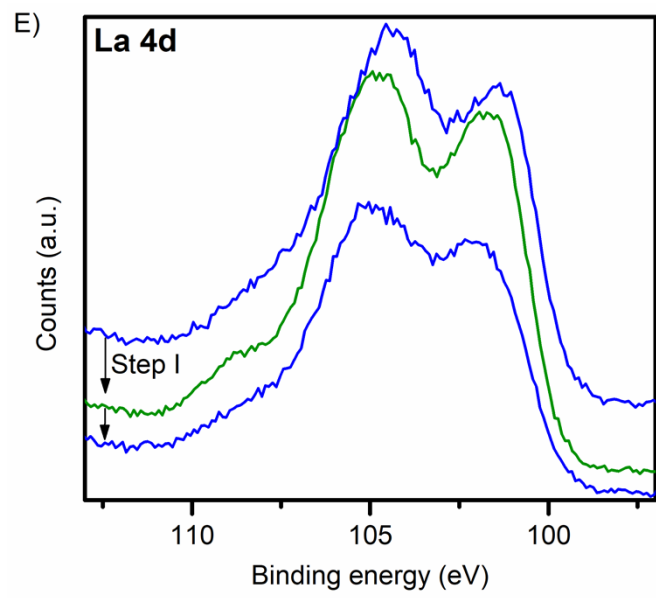

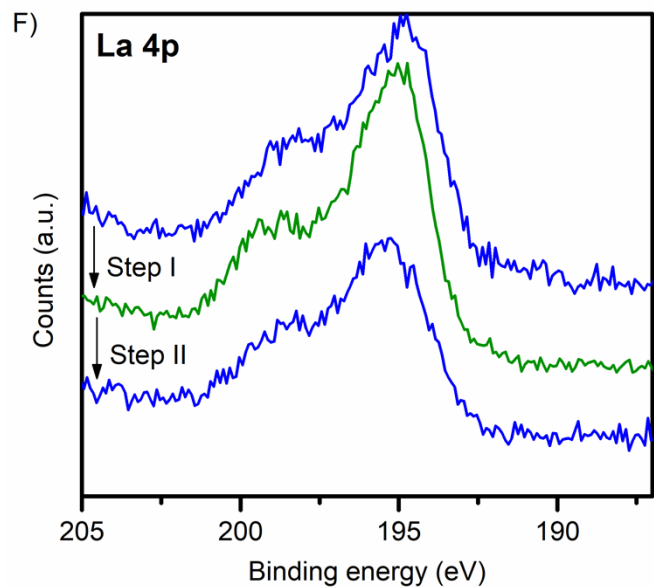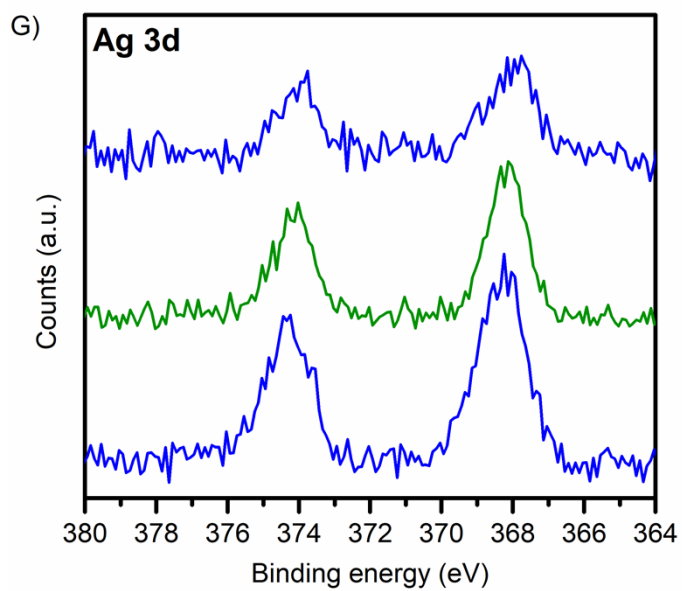

**Figure S3.** XP spectra of LCAO: O 1s (A), Cu 2p (B), Cu LMM (C), La 3d (D), La 4d (E), La 4p (F), Ag 3d (G). Note that Cu LMM overlaps with Ag 3p<sub>3/2</sub>.

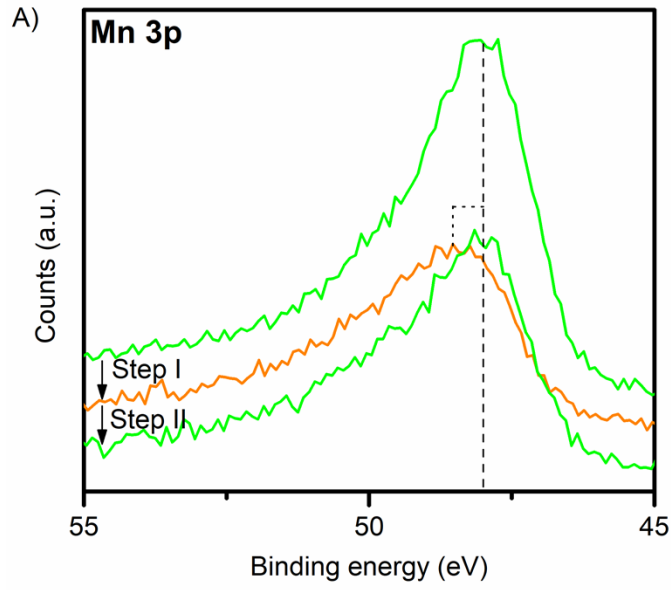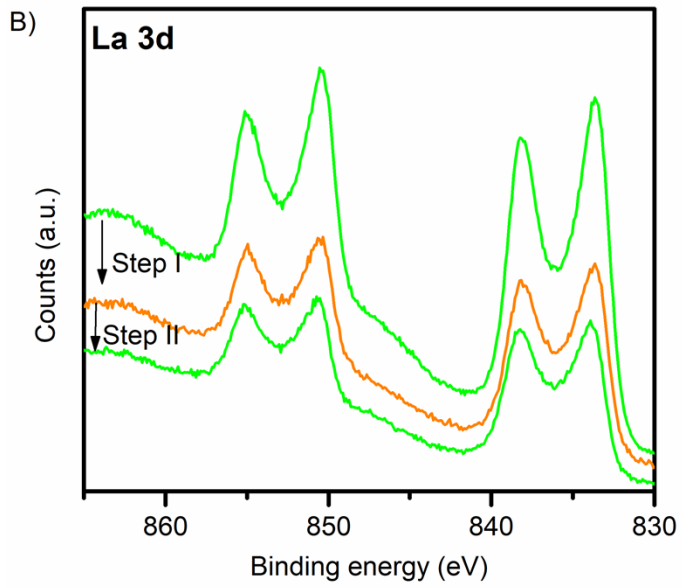

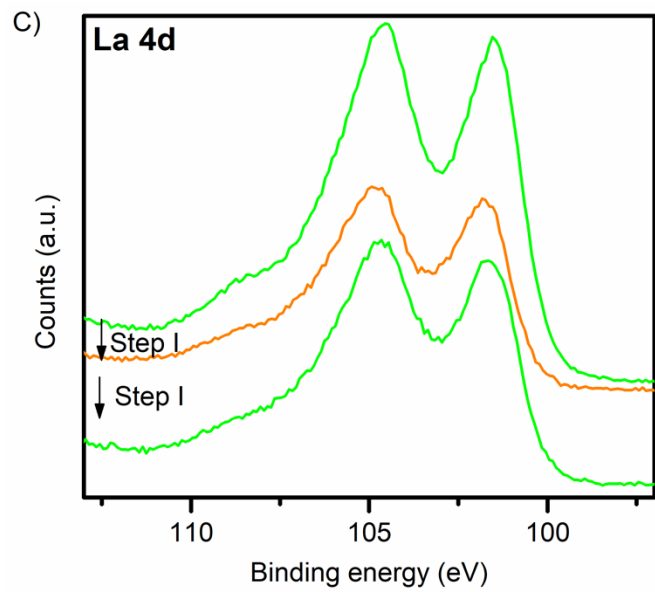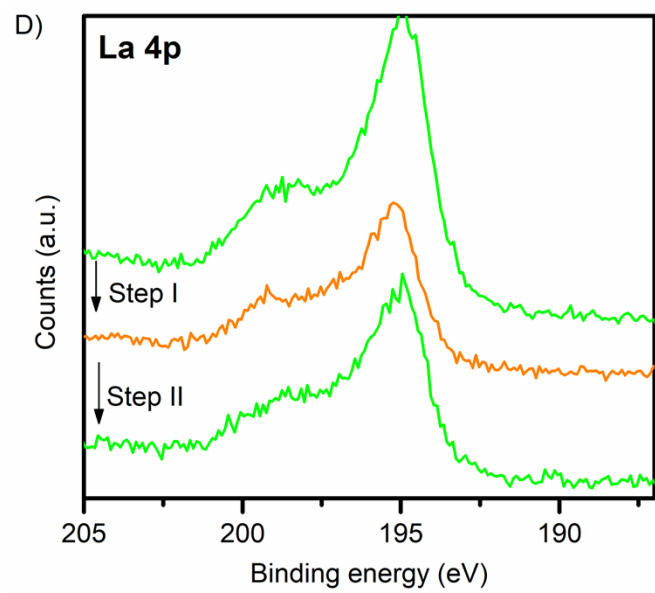

**Figure S4.** XP spectra of LMO: Mn 3p (A), La 3d (B), La 4d (C), La 4p (D)

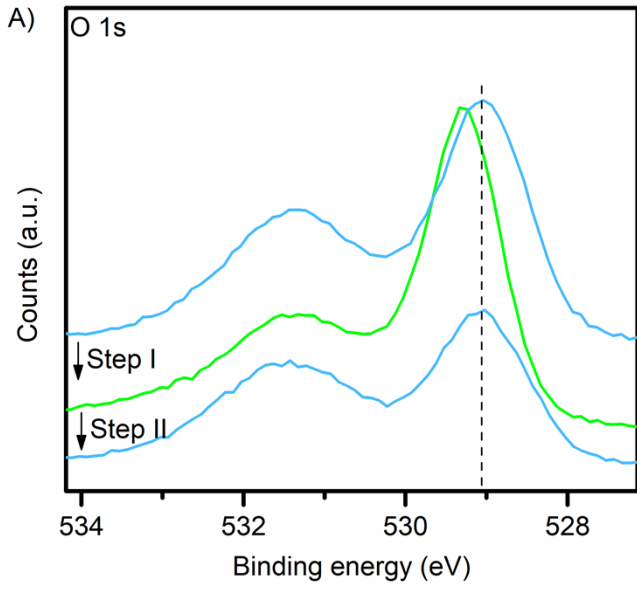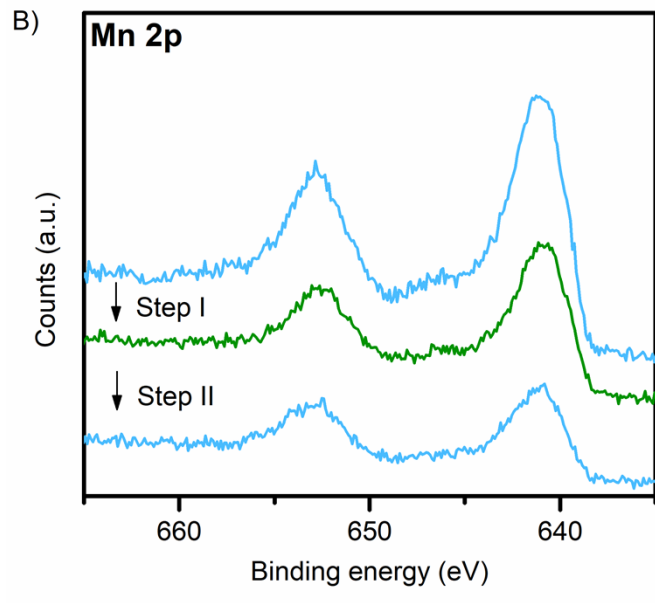



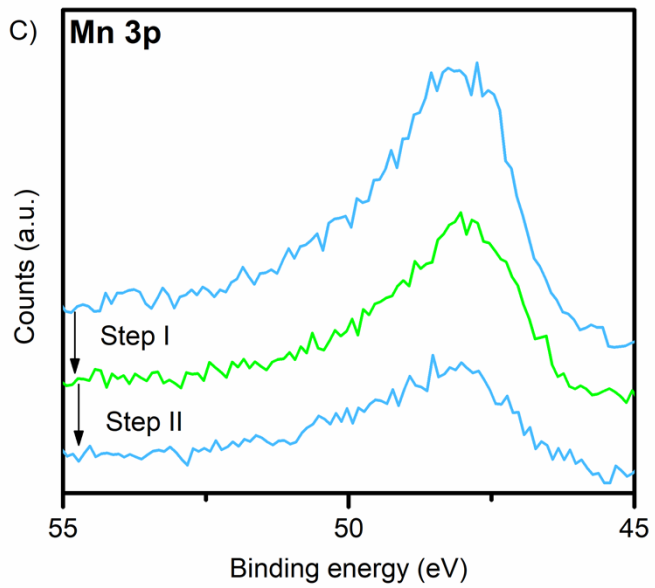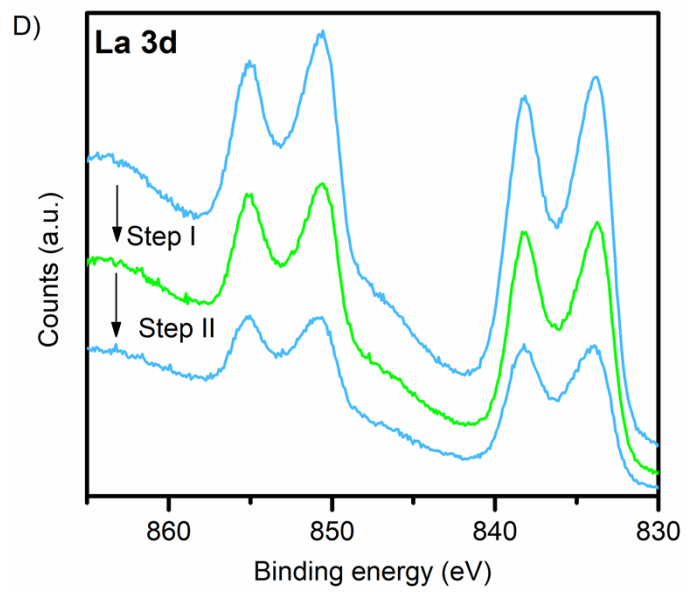

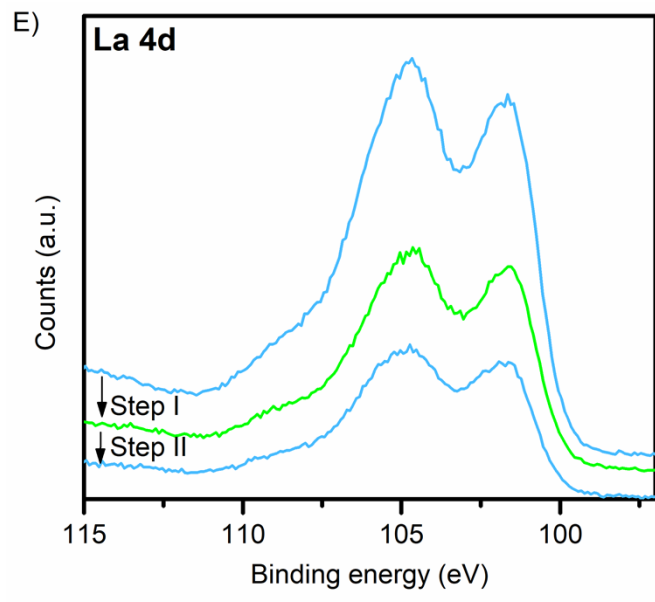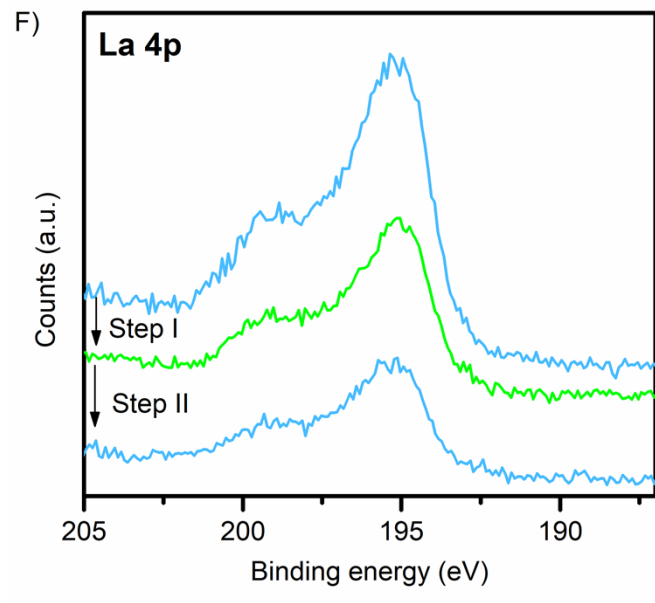

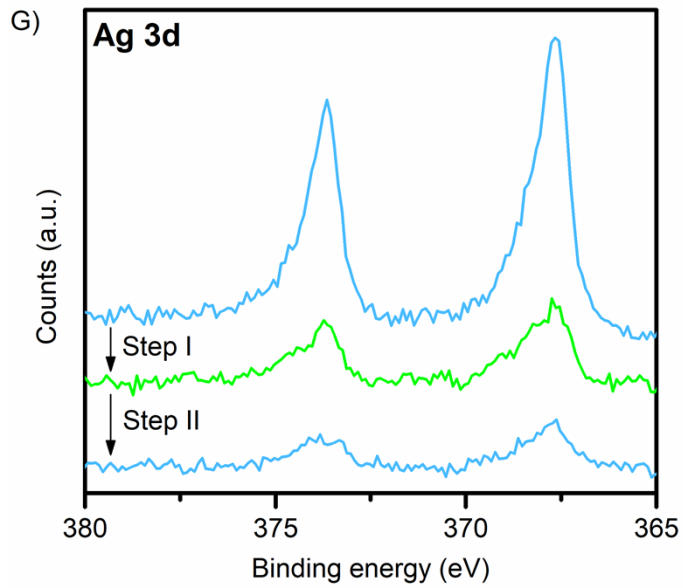

**Figure S5.** XP spectra of LMAO: O 1s (A), Mn 2p (B), Mn 3p (C), La 3d (D), La 4d (E), La 4p (F), Ag 3d (G).

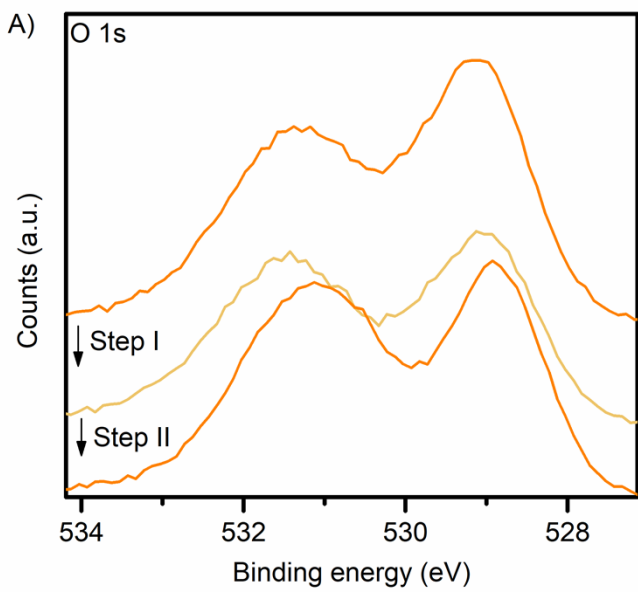

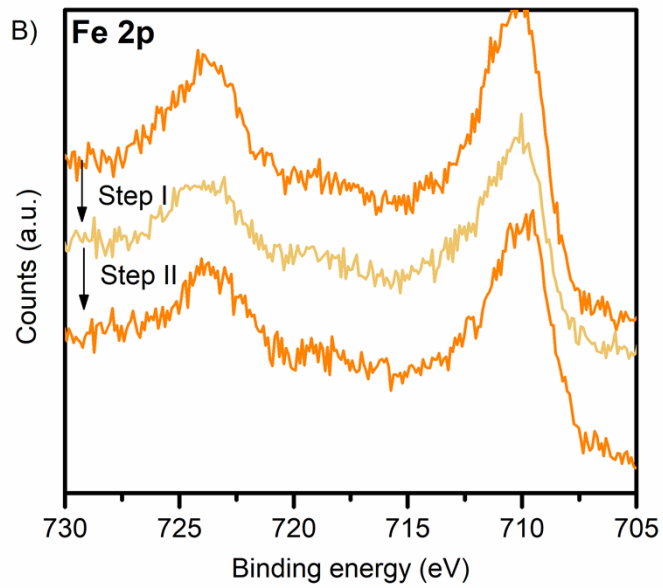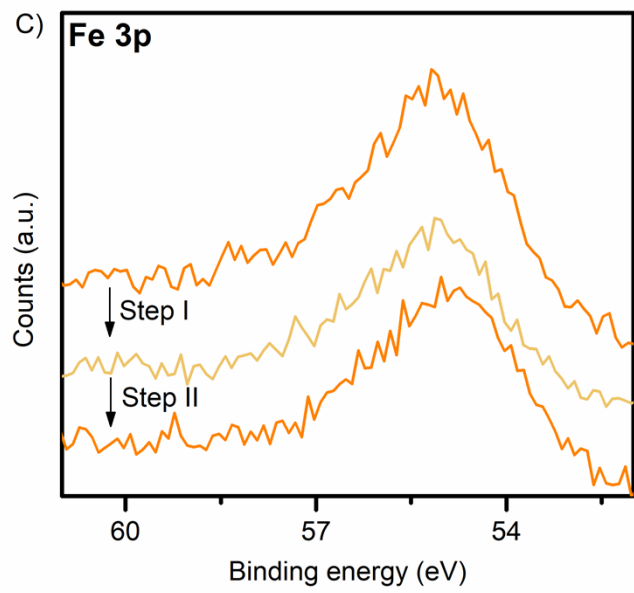

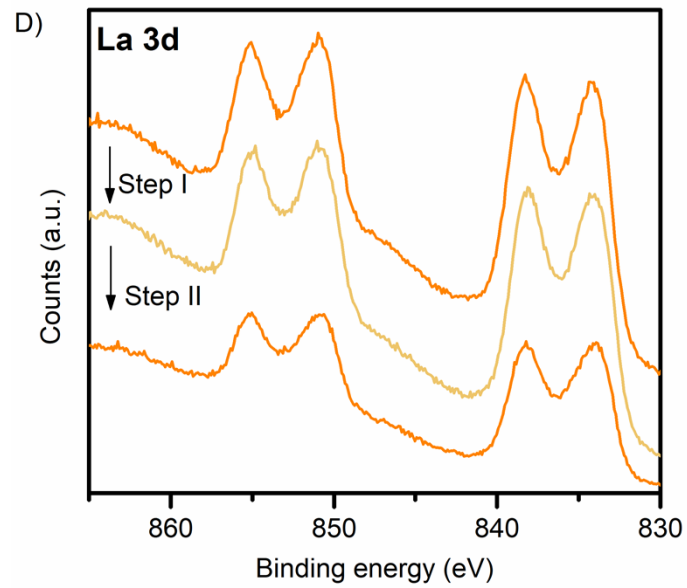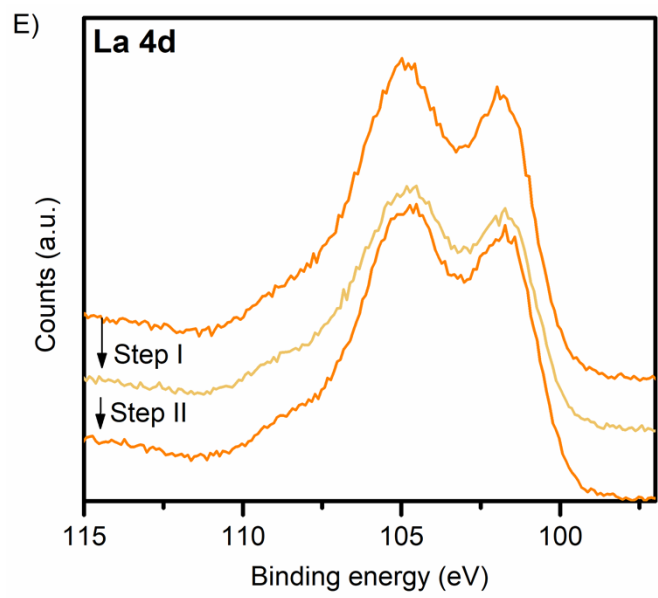

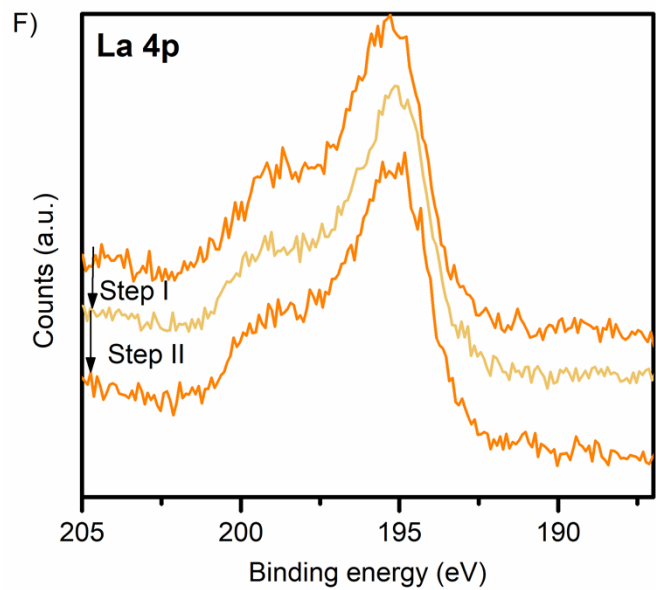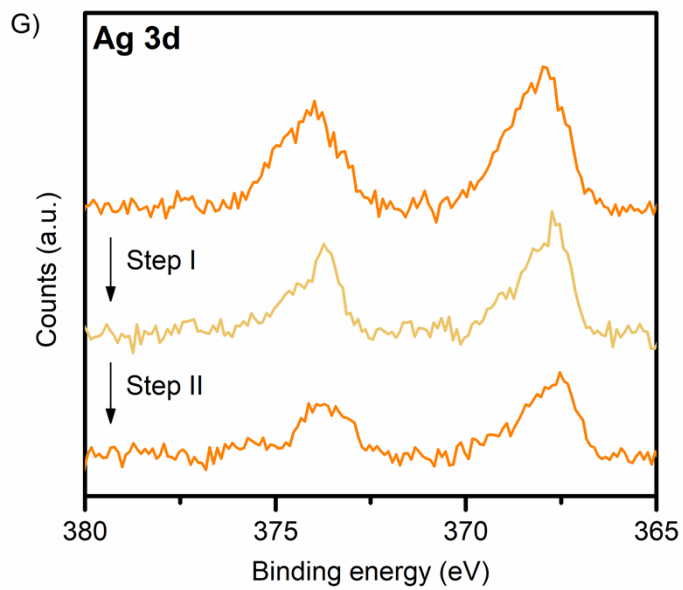

**Figure S6.** XP spectra of LFAO: O 1s (A), Fe 2p (B), Fe 3p (C), La 3d (D), La 4d (E), La 4p (F), Ag 3d (G).
